# Supplementary material for: Methodological standards for qualitative and mixed methods patient centered outcomes research
Source: PubMed Central journal article supplement — BMJ. 2020 Dec 23;371:m4435. doi: 10.1136/bmj.m4435 (PMC7756351; doi:10.1136/bmj.m4435), 2020-12-23
Supplement: gagb054315.ww.pdf [file gagb054315.ww.pdf]

## Supplementary material

**Table 1.** Literature review of PubMed keyword searches and results yield for qualitative and mixed methods research

| <b>Qualitative literature review</b>                                                                                                                                                                                                                                                                                                                                           |                          |
|--------------------------------------------------------------------------------------------------------------------------------------------------------------------------------------------------------------------------------------------------------------------------------------------------------------------------------------------------------------------------------|--------------------------|
| <b>Keyword search combinations</b>                                                                                                                                                                                                                                                                                                                                             | <b>Results yield (n)</b> |
| ("qualitative research"[ti] OR "qualitative inquiry"[ti] OR "qualitative methods"[ti] OR "qualitative standards"[ti]) AND ("checklist"[tw] OR "checklists"[tw] OR "standards"[tw] OR "critical appraisal"[tw]) AND (Journal Article[ptyp] AND ("1990/01/01"[PDAT] : "3000/12/31"[PDAT]) AND English[lang]) AND ( ("1990/01/01"[PDat] : "3000/12/31"[PDat] ) AND English[lang]) | 327                      |
| ("Health Services Research/methods"[Mesh]) AND "Qualitative Research"[Mesh] AND (Journal Article[ptyp] AND English[lang])                                                                                                                                                                                                                                                      | 274                      |
| ("Focus Groups/methods"[Majr]) OR "Interviews as Topic/methods"[Majr] "qualitative"[tw] AND ( ("1990/01/01"[PDat] : "3000/12/31"[PDat] ) AND English[lang])                                                                                                                                                                                                                    | 302                      |
| Research Design/standards*"Qualitative Research"[Mesh] AND ( ( "1990/01/01"[PDat] : "3000/12/31"[PDat] ) AND English[lang])                                                                                                                                                                                                                                                    | 167                      |

| <b>Mixed methods literature review</b>                                                                                                                                                                                                     |                          |
|--------------------------------------------------------------------------------------------------------------------------------------------------------------------------------------------------------------------------------------------|--------------------------|
| <b>Keyword search combinations</b>                                                                                                                                                                                                         | <b>Results yield (n)</b> |
| "Research Design/standards"[Mesh] AND ("mixed method*"[tw] OR "mixed method* research"[All Fields] OR "mixed research"[tw] OR "multimethod*"[tw] OR "multi method*"[tw]) AND (("1990/01/01"[PDAT] : "3000/12/31"[PDAT]) AND English[lang]) | 10                       |

|                                                                                                                                                                                                                                                                                                                       |     |
|-----------------------------------------------------------------------------------------------------------------------------------------------------------------------------------------------------------------------------------------------------------------------------------------------------------------------|-----|
| <p>("Health Services Research/methods"[Mesh]) AND ("mixed method*"[tw] OR "mixed method* research"[All Fields] OR "mixed research"[tw] OR "multimethod*"[tw] OR "multi method*"[tw]) AND ( ( "1990/01/01"[PDat] : "3000/12/31"[PDat] ) AND English[lang])</p>                                                         | 64  |
| <p>"mixed method*"[ti] OR "mixed method* research"[ti] OR "mixed research"[ti] OR "multimethod*"[ti] OR "multi method*"[ti] AND ("checklist"[tw] OR "checklists"[tw] OR "standards"[tw] OR "critical appraisal"[tw]) AND (Journal Article[ptyp])</p>                                                                  | 152 |
| <p>"mixed method*"[ti] OR "mixed method* research"[ti] OR "mixed research"[ti] OR "multimethod*"[ti] OR "multi method*"[ti] AND (Journal Article[ptyp] AND ( "1990/01/01"[PDat] : "3000/12/31"[PDat] ) AND English[lang]) AND (Journal Article[ptyp] AND "last 10 years"[PDat] AND English[lang] AND medline[sb])</p> | 637 |

**Table 2.** Articles used to guide standards development.

|   | Article Citation                                                                                                                                                                  |
|---|-----------------------------------------------------------------------------------------------------------------------------------------------------------------------------------|
| 1 | Baillie L. Promoting and evaluating scientific rigour in qualitative research. <i>Nurs Stand.</i> 2015;29(46):36-42.                                                              |
| 2 | Barbour R. Mixing Qualitative Methods: Quality Assurance or Qualitative Quagmire? <i>Qualitative Health Research.</i> 1998;352-361.                                               |
| 3 | Barbour RS. Checklists for improving rigour in qualitative research: a case of the tail wagging the dog? <i>BMJ.</i> 2001;321:1115-1117.                                          |
| 4 | Barbour RS. The case for combining qualitative and quantitative approaches in health services research. <i>Journal of Health Services Research &amp; Policy.</i> 1999;4(1):39-43. |
| 5 | Burns, N. Standards for Qualitative Research. <i>Nurs Sci Q.</i> 1989 Spring;2(1):44-52.                                                                                          |

|    |                                                                                                                                                                                                                                                      |
|----|------------------------------------------------------------------------------------------------------------------------------------------------------------------------------------------------------------------------------------------------------|
| 6  | Calman L, Brunton L, Molassiotis A. Developing longitudinal qualitative designs: lessons learned and recommendations for health services research. <i>BMC Medical Research Methodology</i> . 2013;13:14.                                             |
| 7  | Carlsen B, Glenton C. What about N? A methodological study of sample-size reporting in focus group studies. <i>BMC Medical Research Methodology</i> . 2011;11:26.                                                                                    |
| 8  | Cesario S, Morin K, Santa-Donato A. Evaluating the level of evidence of qualitative research. <i>JOGNN</i> . 2002;31:708-714.                                                                                                                        |
| 9  | Cohen DJ, Crabtree BF. Evaluation criteria for qualitative research in health care: controversies and recommendations. <i>Annals of Family Medicine</i> . 2008;6(4):331-339.                                                                         |
| 10 | Collingridge D, Gantt EE. The quality of qualitative research. <i>Am J Med Qual</i> . 2008;23(5):389-395.                                                                                                                                            |
| 11 | Cooper C, O'Cathain A, Hind D, et al. Conducting Qualitative research in clinical trial units: Avoiding Potential Pitfalls. <i>Contemporary Clinical Trials</i> . 2014;38:338-343.                                                                   |
| 12 | Cunningham PJ, Felland LE, Ginsburg PB, Pham HH. Qualitative methods: A crucial Tool for Understanding changes in health systems and health care delivery. <i>Medical Care Research and Review</i> . 2011;68(1):34-40.                               |
| 13 | Curry L, Krumholz HM, O'Cathain A, Plano Clark VL, Cherlin E, Bradley EH. Mixed Methods in Biomedical and Health Services Research. <i>Circulation Cardiovascular quality and outcomes</i> . 2013;6(1):119-123. doi:10.1161/CIRCOUTCOMES.112.967885. |
| 14 | Curry LA, Nembhard IM, Bradley EH. Qualitative and mixed methods provide unique contributions to outcomes research. <i>Circulation</i> . 2009 Mar 17;119(10):1442-52. doi: 10.1161/CIRCULATIONAHA.107.742775.                                        |
| 15 | DiCicco-Bloom B, Crabtree BF. The qualitative research interview. <i>Medical Education</i> . 2006;40:314-321.                                                                                                                                        |
| 16 | Dixon-Woods M, Shaw RL, Agarwal S, et al. The problem of appraising qualitative research. <i>Qual Saf Health Care</i> . 2004;13:223-225.                                                                                                             |

|    |                                                                                                                                                                                                 |
|----|-------------------------------------------------------------------------------------------------------------------------------------------------------------------------------------------------|
| 17 | Fitzpatrick R, Boulton M. Qualitative Research in Health Care: 1. the Scope and Validity of Methods. <i>J Eval in Clinical Practice</i> . 1996;2(2):123-130.                                    |
| 18 | Fossey et al, Understanding and Evaluating Qualitative Research. <i>Aust N Z J Psychiatry</i> . 2002 Dec;36(6):717-32                                                                           |
| 19 | Golafshani N. Understanding reliability and validity in qualitative research. <i>The Qualitative Report</i> . 2003;8(4), 597-606.                                                               |
| 20 | Heyvaert M, Hannes K, Maes B, Onghena P. Critical appraisal of mixed methods studies. <i>Journal of Mixed Methods Research</i> . 2013;7(4):302-327                                              |
| 21 | Horsburgh D. Evaluation of qualitative research. <i>Journal of Clinical Nursing</i> . 2003;12:307-312.                                                                                          |
| 22 | Hudson, Peter. Focus group interviews: a guide for palliative care researchers and clinicians. <i>International journal of palliative nursing</i> . 2003;9:202-7. 10.12968/ijpn.2003.9.5.11490. |
| 23 | Klopper H. The qualitative research proposal. <i>Curationis</i> . 2008;31(4):62-72.                                                                                                             |
| 24 | Kuper A, Lingard L, Levinson W. Critically Appraising Qualitative Research. <i>BMJ</i> . 2008;337:687-692.                                                                                      |
| 25 | Lewis J. Redefining Qualitative Methods: Believability in the Fifth Moment. <i>Internation Journal of Qualitative Methods</i> .2009;8(2):1-14.                                                  |
| 26 | Lin, Li-Chen. Data Management and Security in Qualitative Research. <i>Dimensions of critical care nursing</i> . 2009;28:132-7. 10.1097/DCC.0b013e31819aeff6.                                   |
| 27 | Malterud K. Qualitative research: standards, challenges, and guidelines. <i>Lancet</i> . 2001;358:483-488.                                                                                      |
| 28 | Mays N, Pope C. Qualitative research in health care: Assessing quality in qualitative research. <i>BMJ</i> . 2000;320:50-52.                                                                    |
| 29 | McBrien, Barry. Evidence-based care: Enhancing the rigour of a qualitative study. <i>British journal of nursing</i> . 2008;17:1286-9. 10.12968/bjon.2008.17.20.31645.                           |

|    |                                                                                                                                                                                                                                                               |
|----|---------------------------------------------------------------------------------------------------------------------------------------------------------------------------------------------------------------------------------------------------------------|
| 30 | Milne J, Oberle K. Enhancing rigor in qualitative description: a case study. <i>J Wound Ostomy Continence Nurs.</i> 2005 Nov-Dec;32(6):413-20. Review. PMID: 16301909                                                                                         |
| 31 | Morse J. A review committee's guide for evaluating qualitative proposals. <i>Qual Health Res.</i> 2003; 13(6):833-851.                                                                                                                                        |
| 32 | Munn Z, Porritt K, Lockwood C, Aromataris E, Pearson A. Establishing confidence in the output of qualitative research synthesis: the ConQual approach. <i>BMC Medical Research Methodology.</i> 2014; 14:108.                                                 |
| 33 | O'Brien, Bridget & Harris, Ilene & Beckman, Thomas & A Reed, Darcy & A Cook, David. Standards for Reporting Qualitative Research: A Synthesis of Recommendations. <i>Academic medicine: Journal of the Association of American Medical Colleges.</i> 2014;89. |
| 34 | Ostlund U, Kidd L, Wengstrom Y, Rowa-Dewar N. Combining qualitative and quantitative research within mixed method research designs: A methodological review. <i>International Journal of Nursing Studies.</i> 2011;48:369-383.                                |
| 35 | Pearson A, Jordan Z, Lockwood Cr, Aromataris E. Notions of quality and standards for qualitative research reporting. <i>International Journal of Nursing Practice.</i> 2015;21:670-676.                                                                       |
| 36 | Pickler RH. Evaluating Qualitative Research Studies. <i>Journal Pediatric Health Care.</i> 2007;21:195-197.                                                                                                                                                   |
| 37 | Popay J, Rogers A, Williams G. Rationale and standards for the systematic review of qualitative literature in health services research. <i>Qualitative Health Research.</i> 1998;8(3):341-351.                                                                |
| 38 | Pope C, Ziebland S, Mays N. Analysing qualitative data. <i>BMJ.</i> 2000;320(7227):114-116.                                                                                                                                                                   |
| 39 | Powell, Richard & M. Single, Helen. Focus Groups. <i>International journal for quality in health care.</i> 1996;8:499-504.                                                                                                                                    |
| 40 | Reid AJ. What we want: qualitative research. Promising frontier for family medicine. <i>Canadian Family Physician.</i> 1996;42:387-389.                                                                                                                       |

|    |                                                                                                                                                                                                                                    |
|----|------------------------------------------------------------------------------------------------------------------------------------------------------------------------------------------------------------------------------------|
| 41 | Sandelowski M. A matter of taste: evaluating the quality of qualitative research. <i>Nursing Inquiry</i> . 2015;22(2):86-94.                                                                                                       |
| 42 | Sandelowski M. One is the Liveliest Number: The Case Orientation of Qualitative Research. <i>Research in Nursing &amp; Health</i> . 1996;19:525-529.                                                                               |
| 43 | Schou, L, Hostrup H, Lyngso EE, Larsen S, Poulsen I. Validation of a new assessment tool for qualitative research articles. <i>Journal of Advanced Nursing</i> . 2011;68(9):2086-2094.                                             |
| 44 | Stige B, Malterud K, Midtgarden T. Toward an agenda for evaluation of qualitative research. <i>Qualitative Health Research</i> . 2009;19(10):1504-1516.                                                                            |
| 45 | Stige, Brynjulf & Malterud, Kirsti & Midtgarden, Torjus. Toward an Agenda for Evaluation of Qualitative Research. <i>Qualitative health research</i> . 2009;19:1504-16.                                                            |
| 46 | The Guidelines Manual - Appendix 1: Methodology checklist: qualitative studies. <i>National Institute for Health and Clinical Excellence</i> . January 2009;208-266.                                                               |
| 47 | Tong A, Dew MA. Qualitative Research in Transplantation: Ensuring Relevance and Rigor. <i>Transplantation</i> . 2016;100(4):710-712.                                                                                               |
| 48 | Tong A, Flemming K, McInnes E, Oliver S, and Craig J. Enhancing transparency in reporting the synthesis of qualitative research: ENTREQ. <i>BMC Medical Research Methodology</i> . 2012;12:181.                                    |
| 49 | Tong A, Sainsbury P, Craig J. Consolidated criteria for reporting qualitative research (COREQ): a 32-item checklist for interviews and focus groups. <i>International Journal for Quality in Health Care</i> . 2007;19(6):349–357. |
| 50 | Treloar C, Campness S, Simpson PL, Higginbotham N. Critical appraisal checklist for qualitative research studies. <i>Indian Journal of Pediatrics</i> . 2000;67(5):347-351.                                                        |
| 51 | Tuckett A. Qualitative research sampling: the very real complexities. <i>Nurse Res</i> . 2004;12(1):47-61.                                                                                                                         |
| 52 | Tuckett AG. Part II. Rigour in qualitative research: complexities and solutions. <i>Nurse Researcher</i> . 2005;13(1):29-42.                                                                                                       |

|    |                                                                                                                                                                                                                     |
|----|---------------------------------------------------------------------------------------------------------------------------------------------------------------------------------------------------------------------|
| 53 | Watkins D. Qualitative research: the importance of conducting research that doesn't "count". <i>Health Promot Pract.</i> 2012;13(2):153-158.                                                                        |
| 54 | Weiner BJ, Amick HR, Lund JL, Lee SYD, Hoff TJ. Use of qualitative methods in published health services and management research: 10 year review. <i>Medical Care Research and Review.</i> 2011;68(1):3-33.          |
| 55 | Wisdom JP, Cavaleri MA, Onwuegbuzie AJ, Green CA. Methodological Reporting in Qualitative, Quantitative, and Mixed Methods health services research articles. <i>Health Services Research.</i> 2012; 47(2):721-745. |
| 56 | Woods, Leslie & Priest, Helena & Roberts, Paula. An overview of three different approaches to the interpretation of qualitative data. Part 2: Practical illustrations. <i>Nurse researcher.</i> 2002;10:43-51.      |

**Table 3.** Expert panel participants.

| <b>Panel Member</b>         | <b>Institution</b>                                                             | <b>Methodologic Expertise</b> | <b>Field of Study</b>               |
|-----------------------------|--------------------------------------------------------------------------------|-------------------------------|-------------------------------------|
| Frances K. Barg, PhD, Med   | University of Pennsylvania                                                     | Qual/Mixed Methods            | Medical Anthropologist              |
| Benjamin F. Crabtree, PhD   | Rutgers                                                                        | Qual/Mixed Methods            | Medical Anthropologist              |
| Deborah Cohen, PhD          | OHSU School of Medicine                                                        | Qualitative                   | Qualitative methods in primary care |
| Michael Feters, MD, MPH, MA | University of Michigan and co-editor for the Journal of Mixed Methods Research | Mixed Methods                 | Physician and MM expert             |

|                                   |                                    |                    |                                          |
|-----------------------------------|------------------------------------|--------------------|------------------------------------------|
| Suzanne Heurtin-Roberts, PhD, MSW | NCI                                | Qual/Mixed Methods | Medical Anthropologist and Social Worker |
| Deborah K. Padgett, PhD, MPH      | NYU School of Social Work          | Qual/Mixed methods | Professor and Social Worker              |
| Janice Morse, PhD, RN, FAAN       | University of Utah – editor of QHR | Qualitative        | Anthropologist, Nurse, Professor         |
| Lawrence A. Palinkas, PhD         | USC School of Social Work          | Mixed Methods      | Medical Anthropologist                   |
| Vicki L. Plano Clark, PhD         | University of Cincinnati           | Mixed Methods      | Methodologist                            |
| Catherine Pope, PhD.              | University of Southampton          | Qualitative        | Medical Sociologist                      |
